# Supplementary material for: Visible lighted assisted magnetic COF/HKUST/CoFe2O4 composite as a novel photocatalyst: Green synthesis and efficient degradation of pollutants (dye and pharmaceutical) in water
Source: Research Square preprint supplement (doi:10.21203/rs.3.rs-8196220/v1), 2025-12-17
Supplement: Supplementary file 1 [file 06f70b85be74722f644dd4b1.docx]

**Supplementary file**

**Visible lighted assisted magnetic COF/HKUST/CoFe2O4 composite as a novel****photocatalyst: Green synthesis and efficient degradation of pollutants (dye and pharmaceutical) in water**

Bahareh Rabeie a, Niyaz Mohammad Mahmoodi a*, Hossein Kazemian b

a Department of Environmental Research, Institute for Color Science and Technology, Tehran, Iran

b Northern Analytical Laboratory Service (NALS), University of Northern British Columbia (UNBC), Prince George, BC, Canada

*Corresponding author (Prof. Dr. N.M. Mahmoodi)

E-mail addresses:

[*mahmoodi@icrc.ac.ir*](mailto:mahmoodi@icrc.ac.ir)*; nm_mahmoodi@aut.ac.ir (Prof. Dr. N.M. Mahmoodi)*

[*Rabeie-ba@icrc.ac.ir*](mailto:Rabeie-ba@icrc.ac.ir)*; b_rabeie@yahoo.com (Dr. B. Rabeie)*

**2.3. Characterization**

FTIR spectroscopy (Perkin Elmer) was used to study the material functional groups. The materials morphology was investigated by scanning electron microscopy (SEM) LEO 1455VP. To present the synthesized material crystalline structure, the XRD model Siemens D-5000 diffractometer with Cu Kαradiation (λ = 1.5406 A°) has been used by measurement similar to the previous reports. Brunauer–Emmett–Teller (BET) surface area and materials pore volume measurement were carried out using N2 adsorption/desorption isotherms by a micrometric surface area and porosity analyzer (ASAP-2020). Thermogravimetric analysis (TGA) was used to indicate the change in material properties in the temperature range 25 - 850 °C using a Q50 TGA device with a rate of 10 ˚c/min in the presence of nitrogen gas. Scanning electron microscope model LEO 1455VP was used for morphological analysis (SEM) in the manufacturing of the material. Raman spectroscopy with device model (Horiba, Xplora plus) was applied to study the molecular structure of the synthesized materials with a laser source with a wavelength of 532 nm. The residual pollutants concentration in the samples was measured by the double beam UV–Vis spectrophotometer (Perkin Elmer)200-800nm. To collect the sediment of the synthesized samples and also to separate the catalyst from the sampled solutions use universal centrifuge. The pH of the solutions was measured using a Metrohm pH meter.
